# Supplementary material for: Layered Tl2O: a model thermoelectric material
Source: Royal Society of Chemistry journal article supplement (doi:10.1039/c8tc06601a), 2019-01-01
Supplement: c8tc06601a1.pdf [file c8tc06601a1.pdf]

## Supporting Information

### Layered $\text{Tl}_2\text{O}$ : A Model Thermoelectric Material

H.H. Huang<sup>a</sup>, Guangzong Xing<sup>a</sup>, Xiaofeng Fan<sup>a,\*</sup>, David J. Singh<sup>c</sup> and W.T. Zheng<sup>a,b</sup>

a. Key Laboratory of Automobile Materials (Jilin University), Ministry of Education,  
and College of Materials Science and Engineering, Jilin University, Changchun,  
130012, China

b. State Key Laboratory of Automotive Simulation and Control, Jilin University,  
Changchun 130012, China

c. Department of Physics and Astronomy, University of Missouri, Columbia,  
Missouri 65211-7010, USA

\*, Correspondence and requests for materials should be addressed,

Email: [xffan@jlu.edu.cn](mailto:xffan@jlu.edu.cn) (X. Fan)

Tel: +86-159-4301-3494

Figure S1.

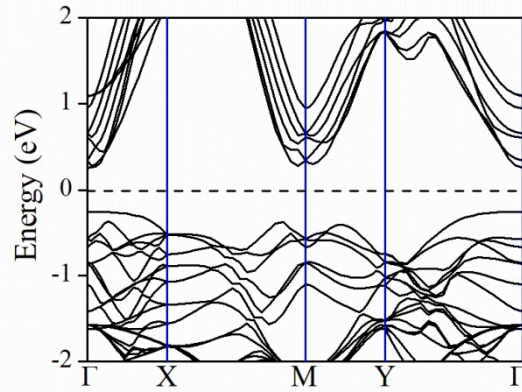

Fig.S1. Band structures of bulk  $Ti_2O$  at PBE level. The dash line denoted Fermi level.

Table S1. Effective masses along transport directions in bulk  $Ti_2O$  calculated by using PBE. The effective mass is in the unit of free electron ( $m_e$ )

|                 | $(m^*)_x (\Gamma-X)$ | $(m^*)_y (\Gamma-Y)$ |
|-----------------|----------------------|----------------------|
| <b>hole</b>     | 7.79                 | 5.78                 |
| <b>electron</b> | 0.11                 | 0.31                 |

Figure S2.

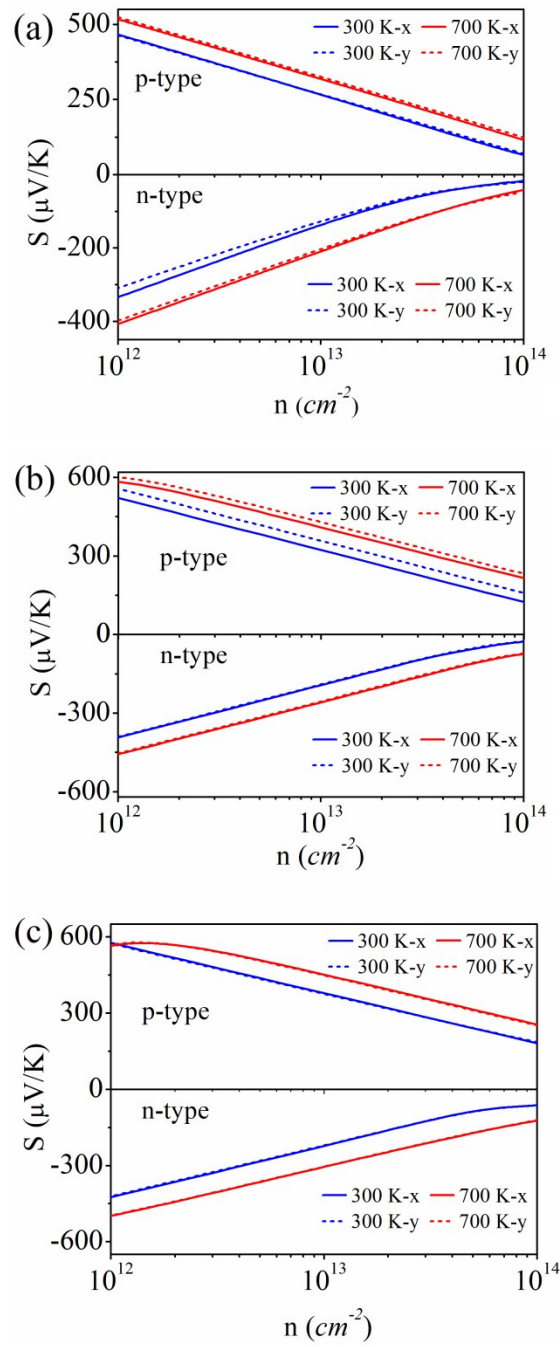

Fig.S2. Seebeck coefficient  $S$  as a function of carriers concentration at 300 K and 700 K along  $x$  and  $y$  directions for (a) SL, (b) BL and (c) TL  $\text{Tl}_2\text{O}$  with  $p$ -type and  $n$ -type.

Figure S3.

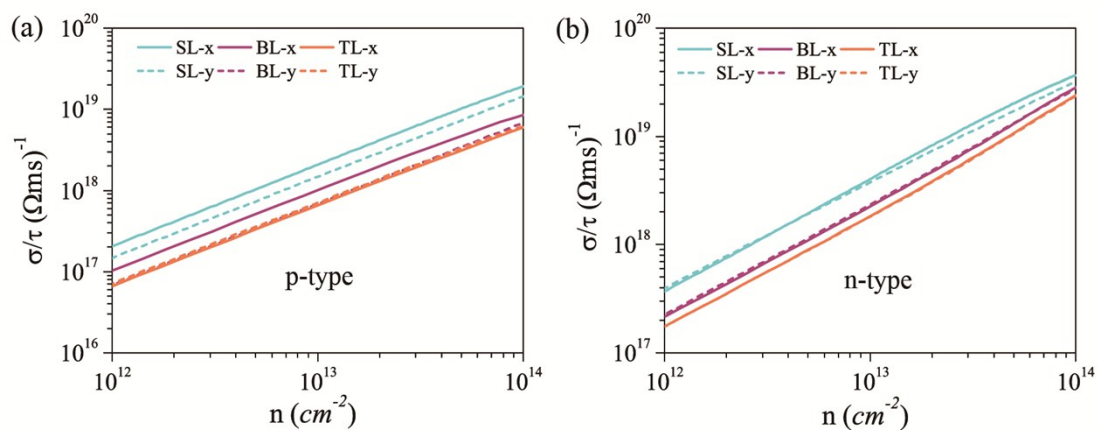

Fig.S3. Electrical conductivities with respect to scattering time  $\sigma/\tau$  at room temperature as a function of carriers concentration along  $x$  and  $y$  directions for SL, BL, TL and bulk  $\text{Ti}_2\text{O}$  with (a)  $p$ -type and (b)  $n$ -type.

Figure S4.

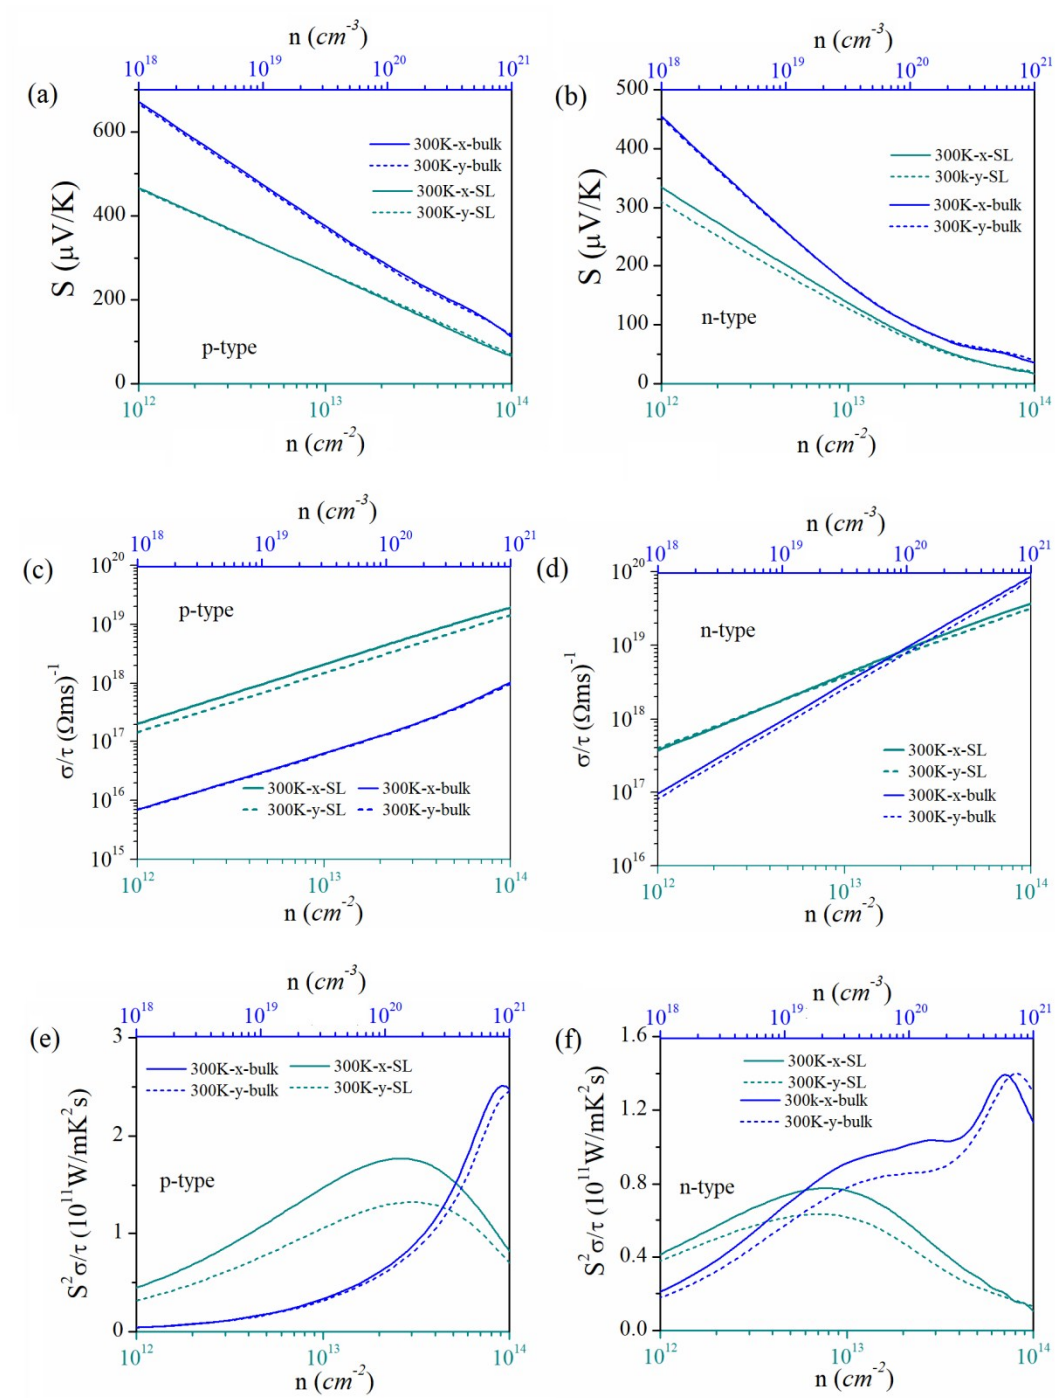

Fig.S4. Seebeck coefficient  $S$ , electronic conductivity with respect to scattering time  $\tau$  ( $\sigma/\tau$ ) and reduced power factor ( $S^2\sigma/\tau$ ) at room temperature as a function of carriers concentration along  $x$  and  $y$  directions for SL and bulk  $\text{Ti}_2\text{O}$  with (a, c, e) p-type, (b, d, f) n-type, respectively.

Figure S5.

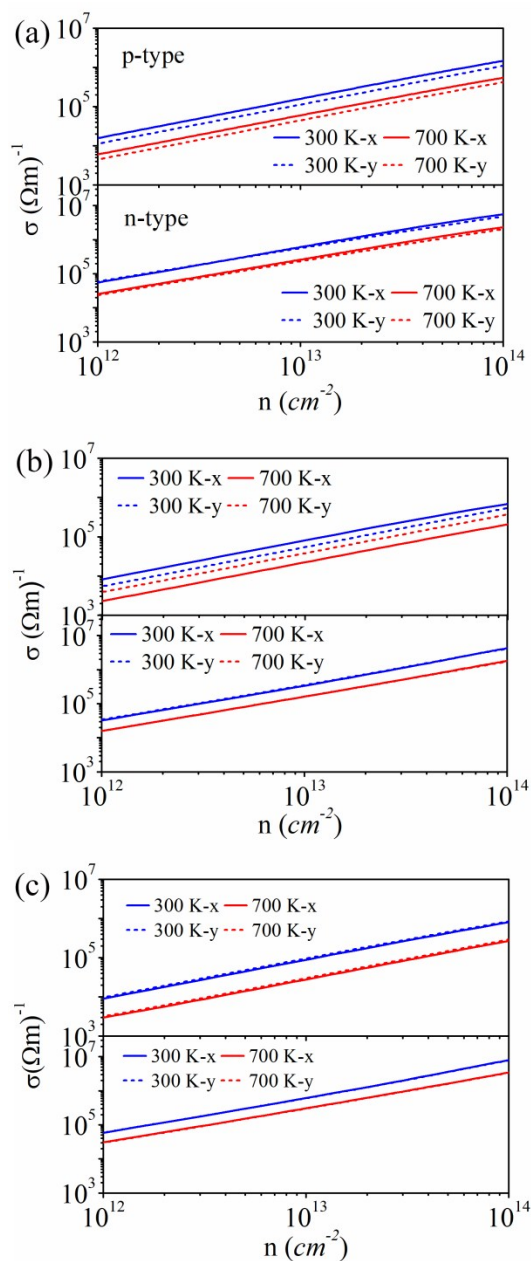

Fig.S5. Electrical conductivities as a function of carriers concentration along  $x$  and  $y$  directions at 300 K and 700 K for (a) single-layer, (b) bilayer and (c) trilayer  $\text{TI}_2\text{O}$  with  $p$ -type and  $n$ -type.

Figure S6.

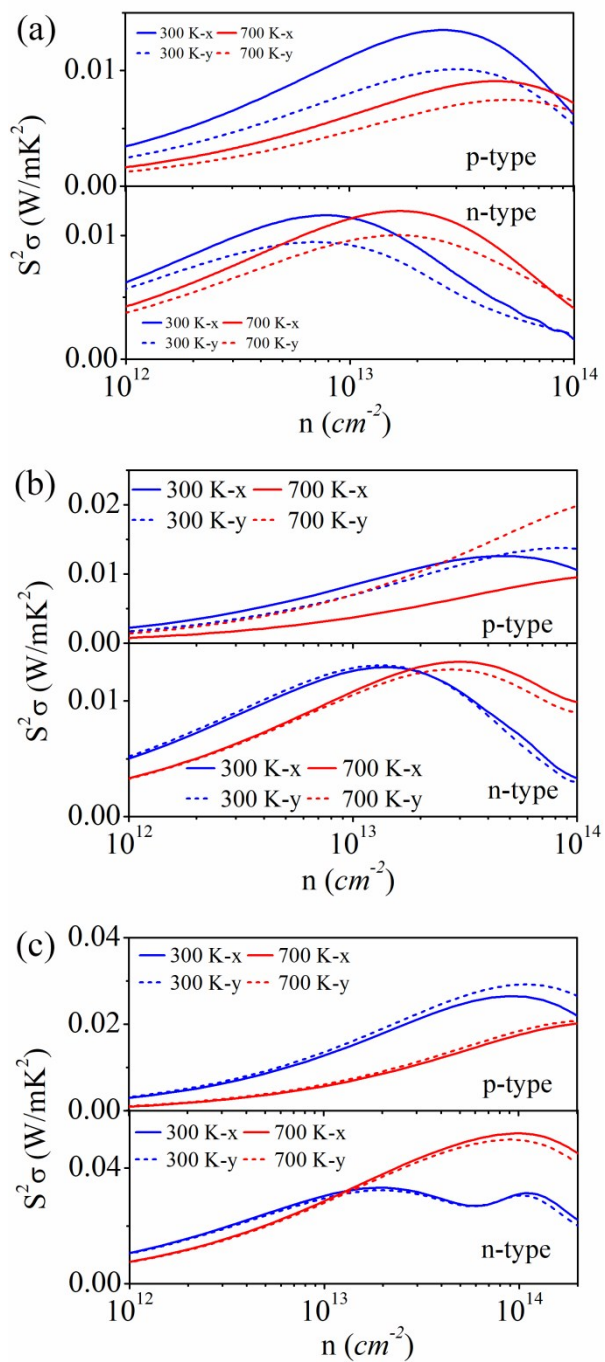

Fig.S6. Power factor  $S^2\sigma$  of (a) single-layer, (b) bilayer and (c) trilayer as a function of carriers concentration at 300 K and 700 K along  $x$  and  $y$  directions.

Figure S7.

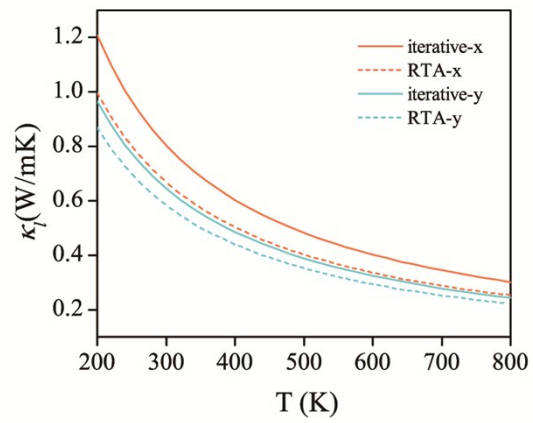

Fig.S7. Calculated  $\kappa_l$  of single-layer  $Ti_2O$  with relaxation time approximation (RTA) (dash line) and from the iterative solution (solid line) of BTE.



Figure S8.

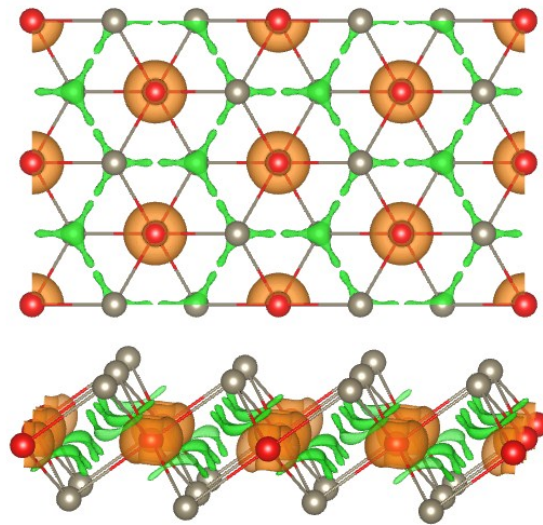

Fig.S8. Charge density difference of SL  $\text{Tl}_2\text{O}$ . Orange represents charge accumulation and green represents charge depletion. Red atom denotes O and grey atom denotes Tl.

Figure S9.

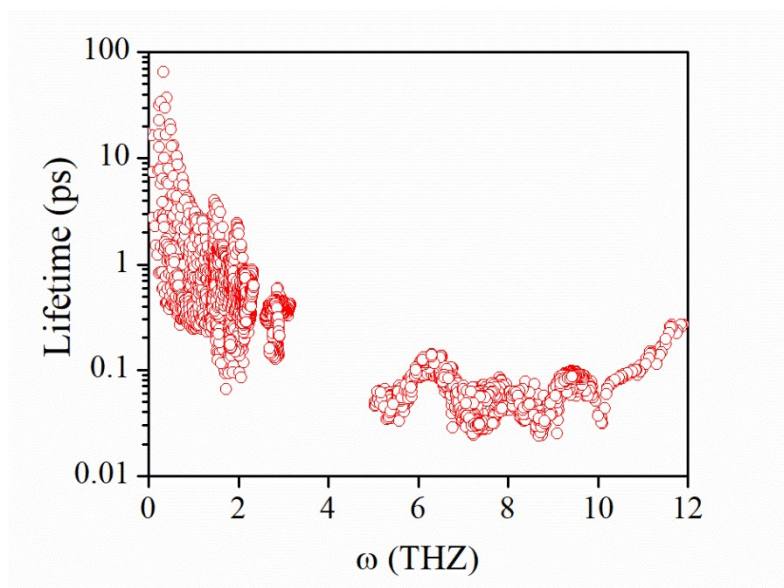

Fig.S9. Calculated phonon lifetime at 300K of SL  $\text{Tl}_2\text{O}$ .
